# Supplementary material for: Transcriptomics Reveal Several Gene Expression Patterns in the Piezophile Desulfovibrio hydrothermalis in Response to Hydrostatic Pressure
Source: PLOS journal article supplement (doi:10.1371/journal.pone.0106831), 2014-09-12

**Figure S1.** KEGG map of phenylalanine, tyrosine, and tryptophan biosynthesis. The Enzyme Commission numbers identified in the *D. hydrothermalis* genome are highlighted in green and yellow. The genes down-regulated at 26 MPa vs. 0.1 MPa are highlighted in yellow. Tag loci of the corresponding enzyme are surrounded in yellow.

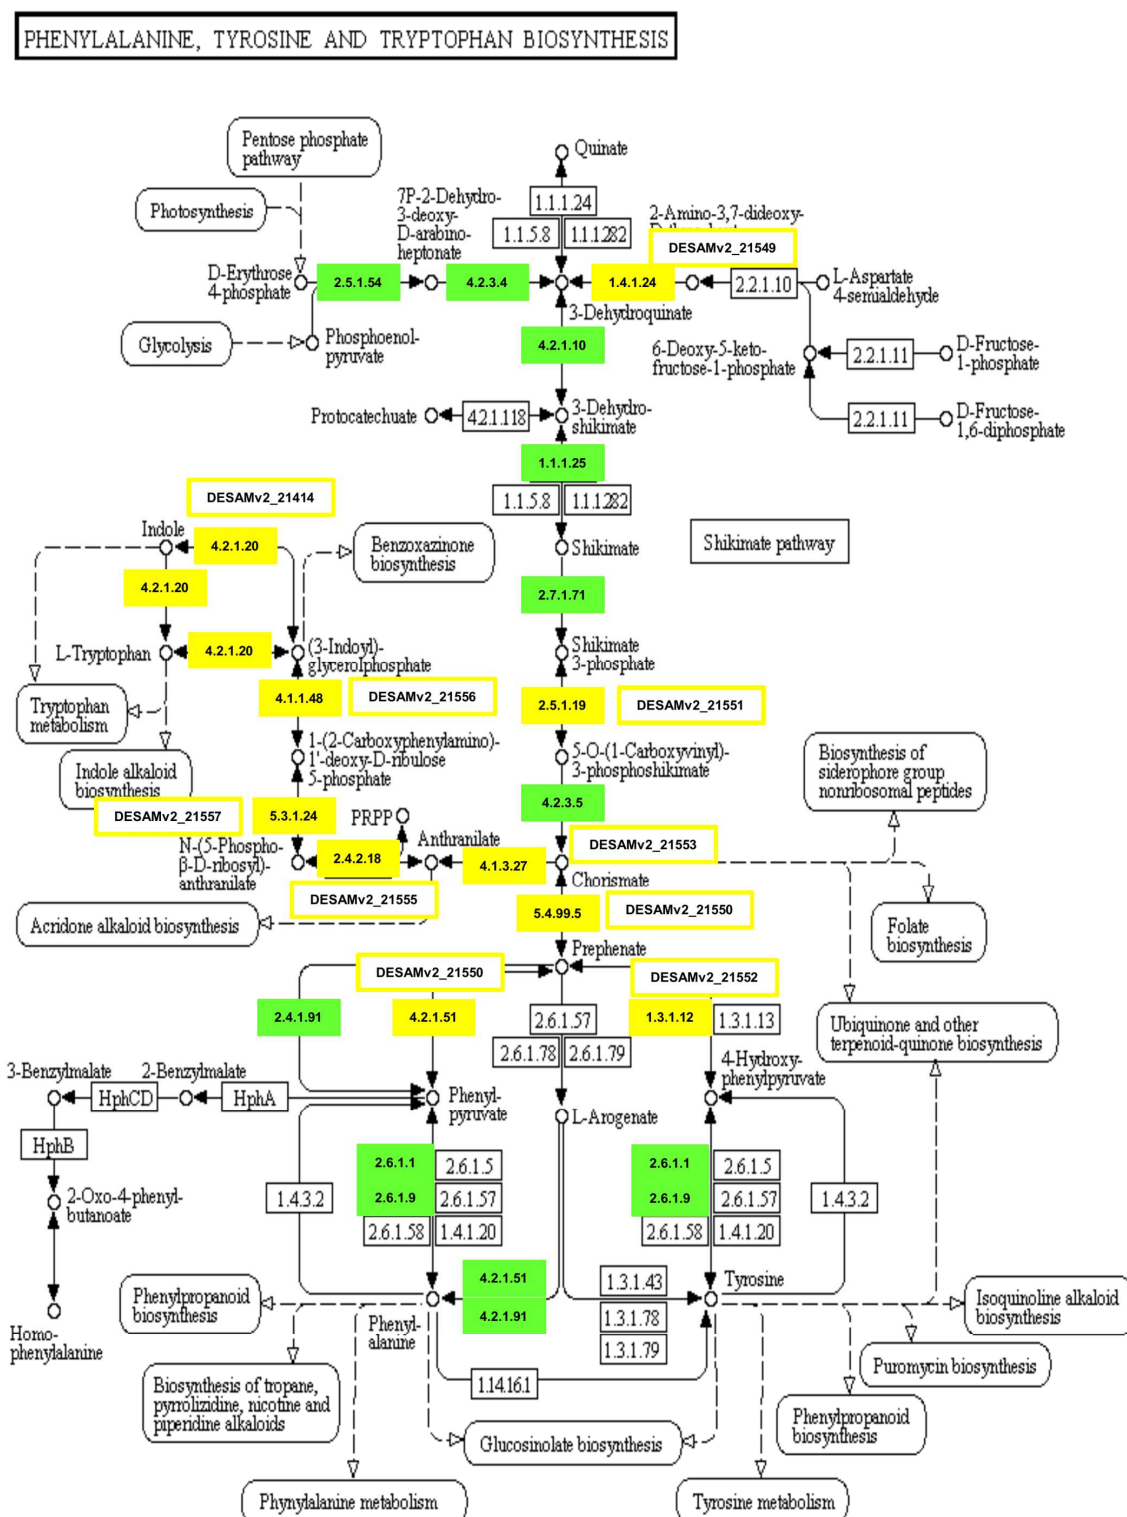

Supplement: S1 (10.1371/journal.pone.0106831.s001) [file journal.pone.0106831.s001]
